# Supplementary material for: Exposure–Response‐Based Product Profile–Driven Clinical Utility Index for Ipatasertib Dose Selection in Prostate Cancer
Source: PubMed Central journal article supplement — CPT Pharmacometrics Syst Pharmacol. 2019 Mar 6;8(4):240–8. doi: 10.1002/psp4.12394 (PMC6482275; doi:10.1002/psp4.12394), 2019-03-06
Supplement: PSP4-8-240-s002.pdf [file PSP4-8-240-s002.pdf]

Table S1. Exposure-rPFS HR Cox proportional-hazards model parameter estimates.

| Parameter                                   | Estimate   | Standard Error | 95% Confidence Interval | P-value |
|---------------------------------------------|------------|----------------|-------------------------|---------|
| AUC <sub>ss,event</sub> as exposure metrics |            |                |                         |         |
| $\beta$                                     | -0.0000739 | 0.0000619      | (-0.000195, 0.0000473)  | 0.232   |
| AUC <sub>ss</sub> as exposure metrics       |            |                |                         |         |
| $\beta$                                     | -0.0000488 | 0.0000549      | (-0.000156, 0.0000588)  | 0.374   |

$$\lambda(t) = \lambda_0(t) * \exp(\beta * AUC_i)$$

where  $\lambda_0(t)$  is the baseline hazard function,  $\beta$  is the slope parameter,  $AUC_i$  is the exposure ( $AUC_{ss,event}$  or  $AUC_{ss}$ ) in subject  $i$ .

Table S2. Exposure-AE logistic regression model parameter estimates.

| Parameter                                                             | Estimate | Standard Error | 95% Confidence Interval | P-value |
|-----------------------------------------------------------------------|----------|----------------|-------------------------|---------|
| Diarrhea grade $\geq 2$ , AUC <sub>ss,event</sub> as exposure metrics |          |                |                         |         |
| $\alpha$                                                              | -3.04    | 0.363          | (-3.81,-2.38)           | -       |
| $\beta$                                                               | 0.000769 | 0.000133       | (0.000521,0.00104)      | <0.001  |
| Diarrhea grade $\geq 2$ , AUC <sub>ss</sub> as exposure metrics       |          |                |                         |         |
| $\alpha$                                                              | -2.94    | 0.354          | (-3.69,-2.29)           | -       |
| $\beta$                                                               | 0.000669 | 0.000120       | (0.000444,0.000917)     | <0.001  |
| Diarrhea grade $\geq 3$ , AUC <sub>ss,event</sub> as exposure metrics |          |                |                         |         |
| $\alpha$                                                              | -4.56    | 0.689          | (-6.12,-3.38)           | -       |
| $\beta$                                                               | 0.000798 | 0.000235       | (0.000362,0.00130)      | <0.001  |
| Diarrhea grade $\geq 3$ , AUC <sub>ss</sub> as exposure metrics       |          |                |                         |         |
| $\alpha$                                                              | -4.38    | 0.661          | (-5.87,-3.24)           | -       |
| $\beta$                                                               | 0.000640 | 0.000204       | (0.000259,0.00107)      | 0.00173 |
| Rash grade $\geq 2$ , AUC <sub>ss,event</sub> as exposure metrics     |          |                |                         |         |
| $\alpha$                                                              | -5.53    | 0.840          | (-7.45,-4.10)           | -       |
| $\beta$                                                               | 0.00112  | 0.000251       | (0.000669,0.00167)      | <0.001  |
| Rash grade $\geq 2$ , AUC <sub>ss</sub> as exposure metrics           |          |                |                         |         |
| $\alpha$                                                              | -5.73    | 0.932          | (-7.89,-4.17)           | -       |
| $\beta$                                                               | 0.00107  | 0.000251       | (0.000627,0.00163)      | <0.001  |
| Rash grade $\geq 3$ , AUC <sub>ss,event</sub> as exposure metrics     |          |                |                         |         |
| $\alpha$                                                              | -6.04    | 0.984          | (-8.32,-4.40)           | -       |
| $\beta$                                                               | 0.00118  | 0.000282       | (0.000684,0.00181)      | <0.001  |
| Rash grade $\geq 3$ , AUC <sub>ss</sub> as exposure metrics           |          |                |                         |         |
| $\alpha$                                                              | -6.47    | 1.16           | (-9.19,-4.57)           | -       |
| $\beta$                                                               | 0.00119  | 0.000300       | (0.000673,0.00187)      | <0.001  |

$$\text{logit}(P(AE_i=1)) = \alpha + \beta * AUC_i$$

where  $P(AE_i=1)$  is the probability that adverse event from subject  $i$  occurs (ie, grade  $\geq 2$  diarrhea),  $\alpha$  is the intercept parameter,  $\beta$  is the slope parameter, and  $AUC_i$  the exposure (AUC<sub>ss,event</sub> or AUC<sub>ss</sub>) of subject  $i$ .
